# Supplementary material for: A library of Rhodamine6G-based pH-sensitive fluorescent probes with versatile in vivo and in vitro applications
Source: Royal Society of Chemistry journal article supplement (doi:10.1039/d2cb00030j), 2022-01-01
Supplement: d2cb00030j2.pdf [file d2cb00030j2.pdf]

### Supplementary Figures

Swanson et al, 2022. *RSC Chemical Biology*

**S Fig 1**

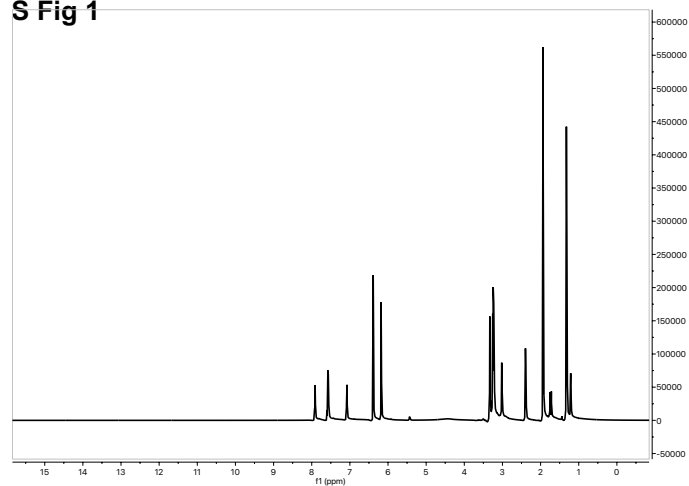

**S Fig 1:** <sup>1</sup>H NMR spectrum of (3). Detailed spectroscopic characterization of all compounds is listed in the Supplemental Methods.

**S Fig 2**

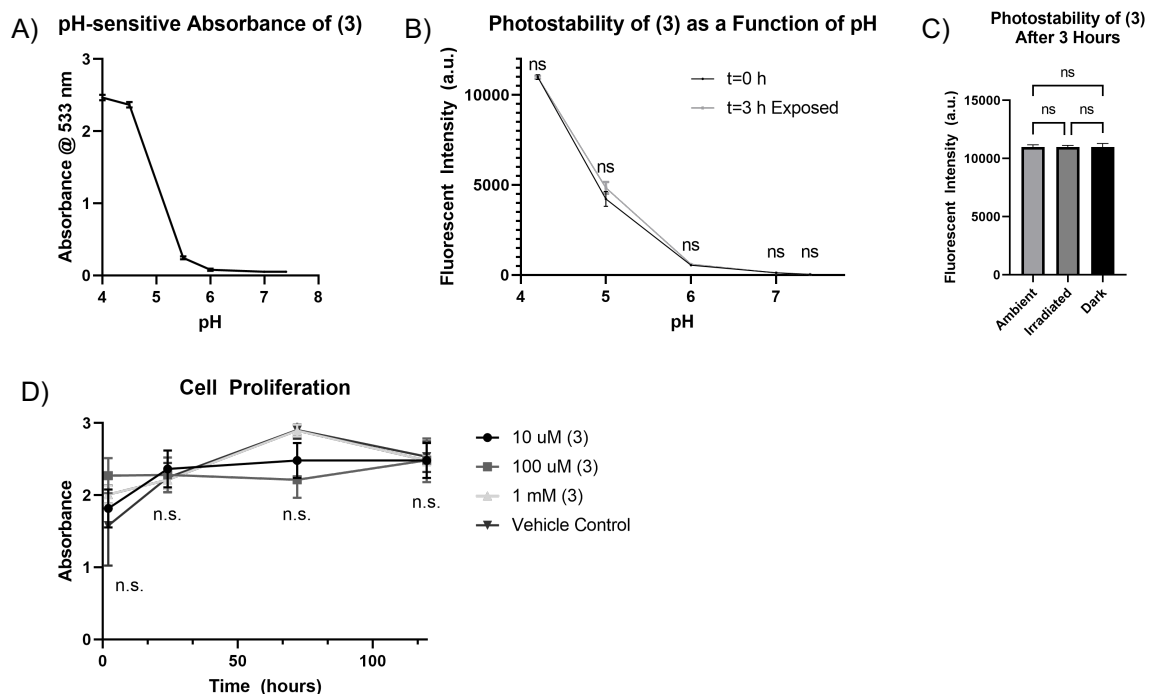

**S Fig 2:** Absorbance of (3) changes with pH similar to fluorescence (A). After exposure to direct irradiation at 560 nm, (3) maintains its pH-sensitive fluorescent properties compared to freshly prepared solution at t=0 hours (B). After three hours of aging, we observed no difference between solutions of (3) exposed to ambient light, direct irradiation, or kept in the dark (C). Up to 1 mM concentration in cell culture media, (3) does not affect proliferation of RAW264.7 cells (D).

S Fig 3

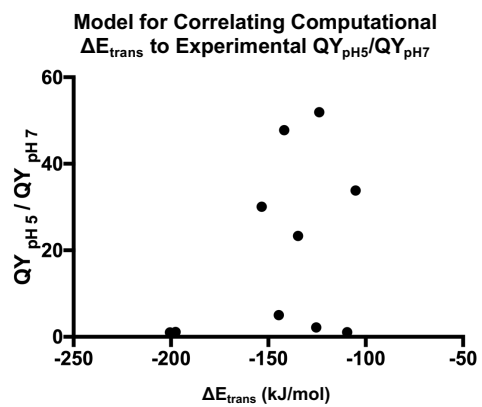

S Fig 3: Calculated Gibbs free energy of transition is plotted against experimentally observed quantum yield sensitivity ratio.

### S Fig 4

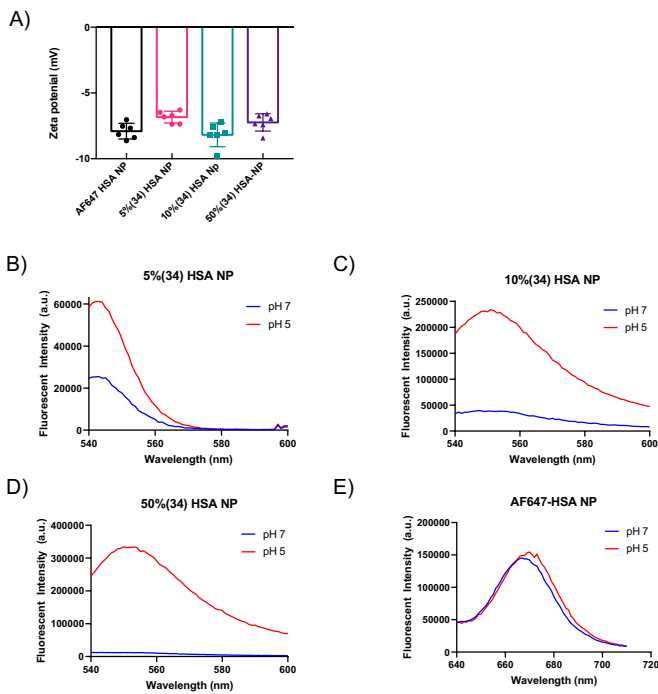

**S Fig 4:** (34)-HSA NPs were fabricated at three compositions (5%, 10%, 50%) compared to AF-647 HSA control. Particle surface charge is measured by zeta potential (A). Fluorescence spectra of particles in solution (5 ug/mL) were recorded at pH 7 and 5 to determine pH-sensitive properties (B-E).

**S Fig 5**

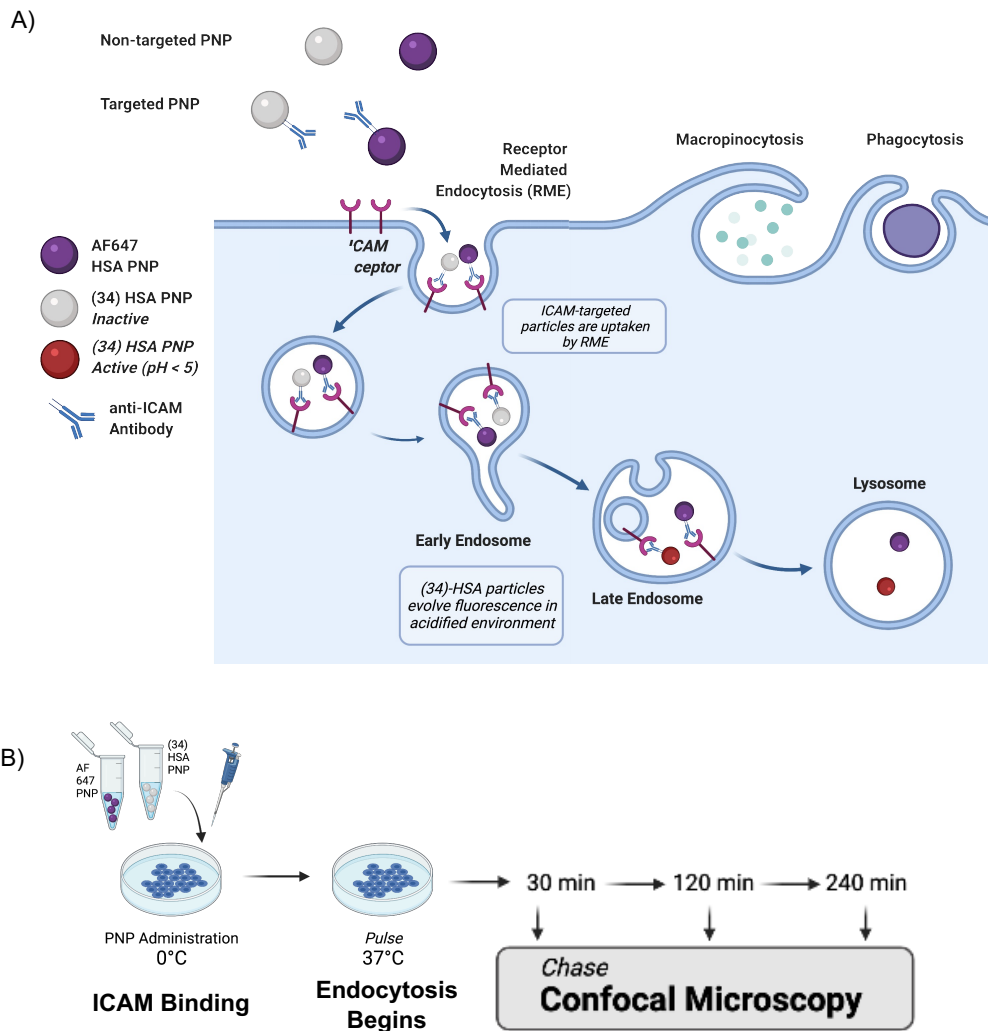

**S Fig 5:** Schematic overview of receptor mediated endocytosis targeting (A) and pulse chase experiment (B).

### S Fig 6

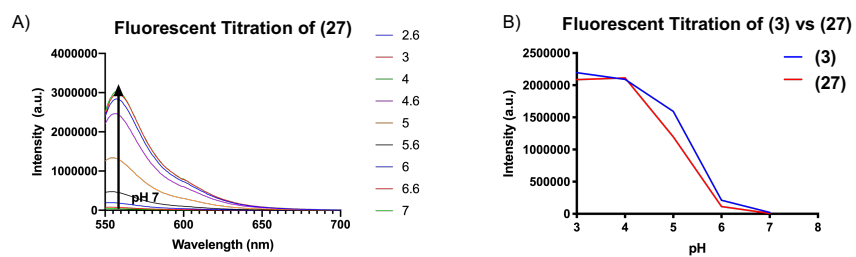

S Fig 6: Fluorescence spectroscopy titration of (27) as a function of pH (A) and compared to (3) (B).

## S Fig 7

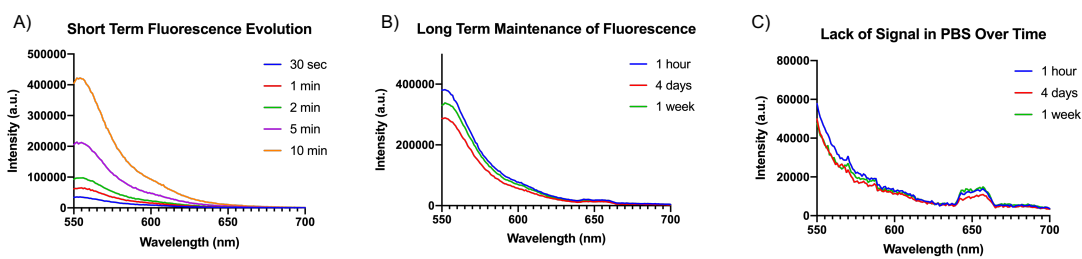

S Fig 7: Fluorescence spectra of (28)-films in pH 4 solution are recorded over time to demonstrate rapid signal evolution (B) and maintenance of signal (C). When incubated in PBS, only minimal background signal is observed up to 1 week in vitro (D).

### S Fig 8

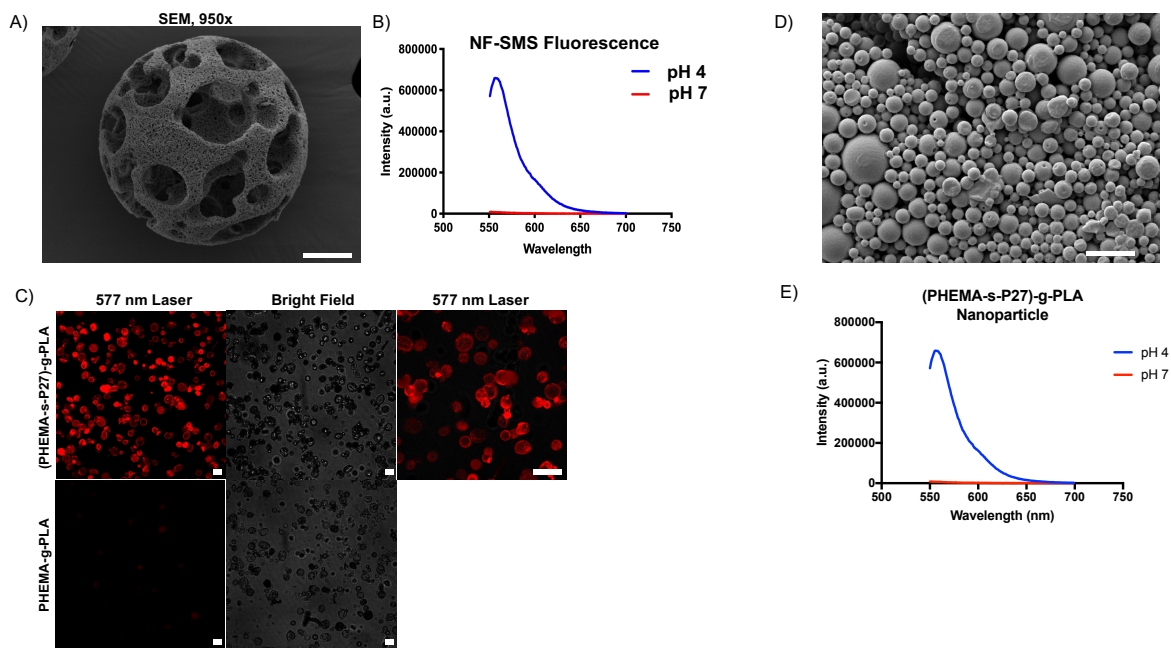

S Fig 8: (27)-functionalized PLA is fabricated into highly porous nanofibrous spongy microspheres (NF-SMS, A, scale = 15  $\mu\text{m}$ ), and maintain the fluorescent properties of (27) at pH 4 and 7 (B). Microspheres in solution are observed by confocal laser microscopy at pH 4 compared to non-functionalized PLA control (C, scale = 50  $\mu\text{m}$ ). (27)-functionalized PLA is also fabricated into nanoparticles by a double emulsion sonication method (D, scale = 500 nm), which also maintain the fluorescent properties of (27) at pH 4 and 7 (E).



### S Fig 9

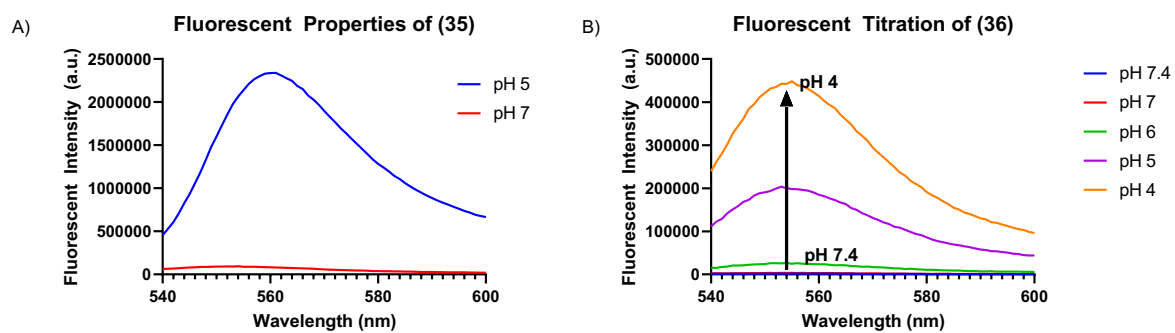

S Fig 9: Fluorescence spectra of (35) and (36) are recorded at pH 5 and pH 7.
